# Supplementary material for: The soluble guanylate cyclase stimulator IW‐1973 prevents inflammation and fibrosis in experimental non‐alcoholic steatohepatitis
Source: PubMed Central journal article supplement — Br J Pharmacol. 2018 Jan 31;175(6):953–67. doi: 10.1111/bph.14137 (PMC5825296; doi:10.1111/bph.14137), 2018-01-31
Supplement: BPH-175-953-s001.pdf [file BPH-175-953-s001.pdf]

## **SUPPORTING INFORMATION**

### **The soluble guanylate cyclase stimulator IW-1973 prevents inflammation and fibrosis in experimental non-alcoholic steatohepatitis.**

Roger Flores-Costa<sup>1</sup>, José Alcaraz-Quiles<sup>1</sup>, Esther Titos<sup>1,3</sup>, Cristina López-Vicario<sup>1,3</sup>, Mireia Casulleras<sup>1</sup>, Marta Duran-Güell<sup>1</sup>, Bibiana Rius<sup>1</sup>, Alba Diaz<sup>2</sup>, Katherine Hall<sup>6</sup>, Courtney Shea<sup>6</sup>, Renee Sarno<sup>6</sup>, Mark Currie<sup>6</sup>, Jaime L. Masferrer<sup>6</sup> and Joan Clària<sup>1,3,4,5</sup>.

<sup>1</sup>Department of Biochemistry and Molecular Genetics and <sup>2</sup>Department of Pathology, Hospital Clínic, IDIBAPS; <sup>3</sup>CIBERehd; <sup>4</sup>Department of Biomedical Sciences, University of Barcelona and <sup>5</sup>European Foundation for the Study of Chronic Liver Failure (EF-CLIF), Barcelona, Spain; <sup>6</sup>Ironwood Pharmaceuticals Inc., Cambridge, MA, USA.

#### **Index of contents:**

Supplementary Figure 1.

Supplementary Figure 2.

Supplementary Figure 3.

Supplementary Figure 4.

Supplementary Figure 5.

Supplementary Figure 6.

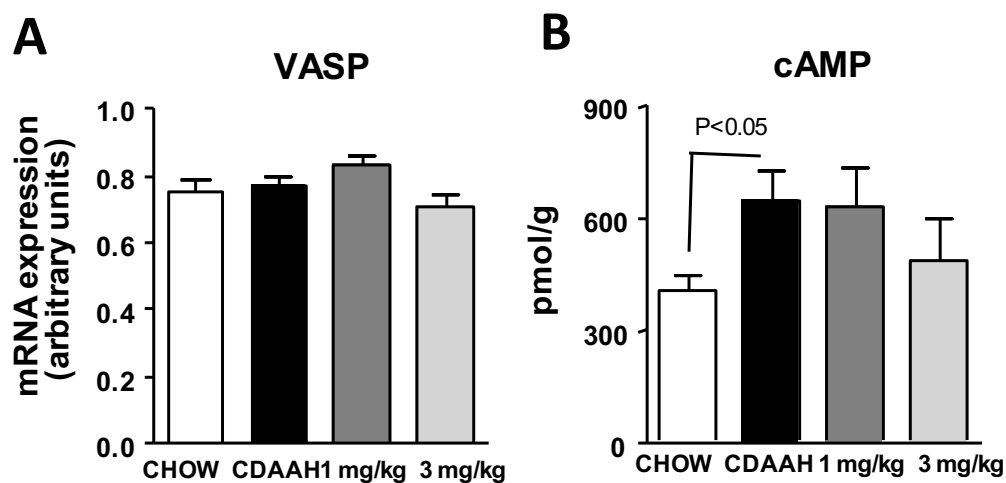

**Supplementary Figure 1. Effects of IW-1973 on hepatic cyclic nucleotide pathway. (A)** VASP mRNA expression as determined by real-time PCR in liver samples from mice receiving either chow diet (n=10), choline-deficient, L-amino acid-defined, high-fat (CDAAH) diet (n=15), CDAAH plus sGC stimulator IW-1973 at 1 mg/kg (n=10) or CDAAH plus IW-1973 at 3 mg/kg (n=10). **(B)** Hepatic tissue levels of cAMP in these groups of animals as determined by EIA. Results are expressed as mean  $\pm$  SEM.

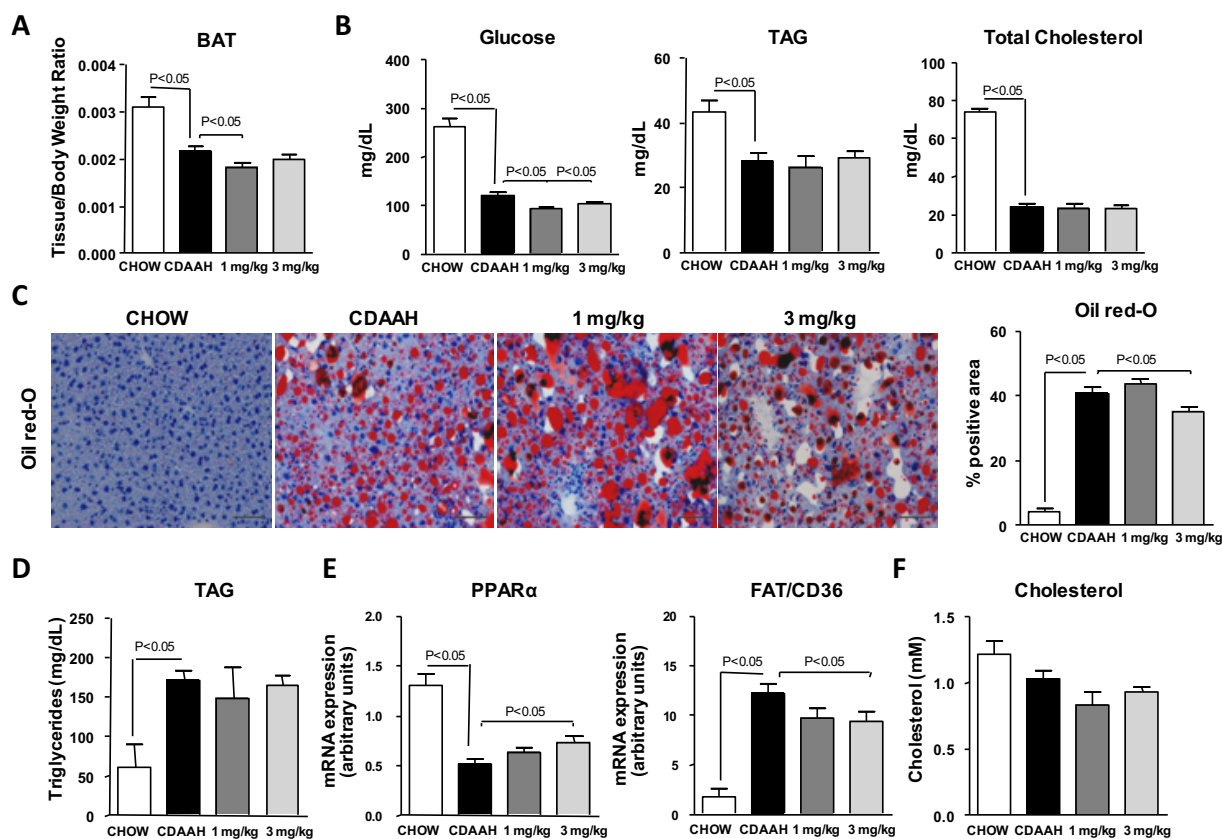

**Supplementary Figure 2. Effects of IW-1973 on plasma biochemistry and steatosis. (A)** BAT-to-body weight ratio in mice receiving either chow diet (n=10), CDAAH diet (n=15), CDAAH plus sGC stimulator IW-1973 at 1 mg/kg (n=10) or CDAAH plus IW-1973 at 3 mg/kg (n=10). **(B)** Plasma glucose, TAG and total cholesterol levels. **(C)** Representative photomicrographs (200x magnification) of liver sections and histomorphometric analysis of the area stained with Oil red-O. **(D)** Hepatic TAG levels. **(E)** Hepatic PPAR $\alpha$  and FAT/CD36 mRNA expression. **(F)** Hepatic cholesterol levels. Results are expressed as mean  $\pm$  SEM. Scale bar = 50  $\mu$ m.

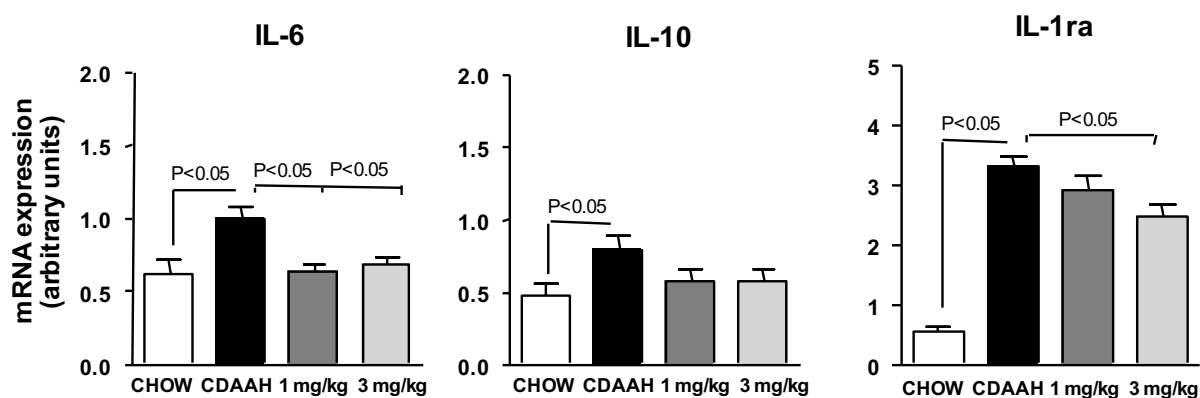

**Supplementary Figure 3. Effects of IW-1973 on hepatic cytokine expression.** Hepatic IL-6, IL-10 and IL-1ra mRNA expression in mice receiving either chow diet (n=10), CDAAH diet (n=15), CDAAH plus sGC stimulator IW-1973 at 1 mg/kg (n=10) or CDAAH plus IW-1973 at 3 mg/kg (n=10). Results are expressed as mean ± SEM.

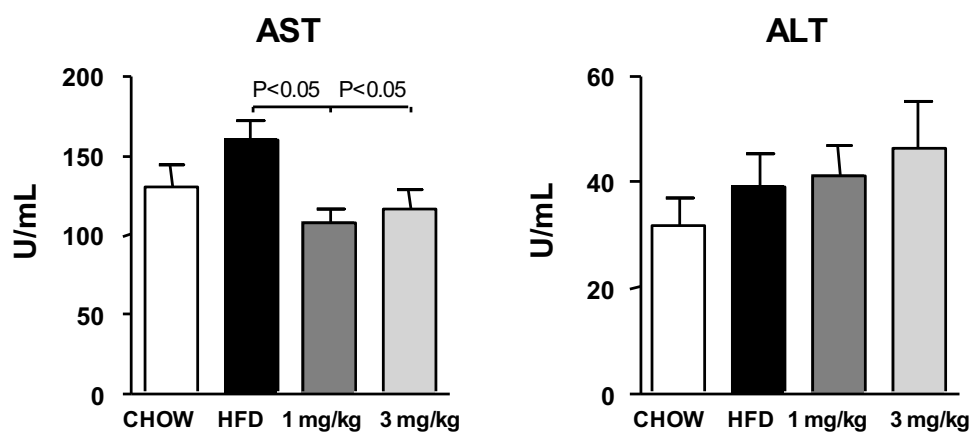

**Supplementary Figure 4.** Effects of IW-1973 on plasma transaminase (i.e. AST and ALT) levels in mice receiving either chow diet (n=5), an obesogenic HFD diet (n=10), HFD plus sGC stimulator IW-1973 at 1 mg/kg (n=10) or HFD plus IW-1973 at 3 mg/kg (n=10). Results are expressed as mean  $\pm$  SEM.

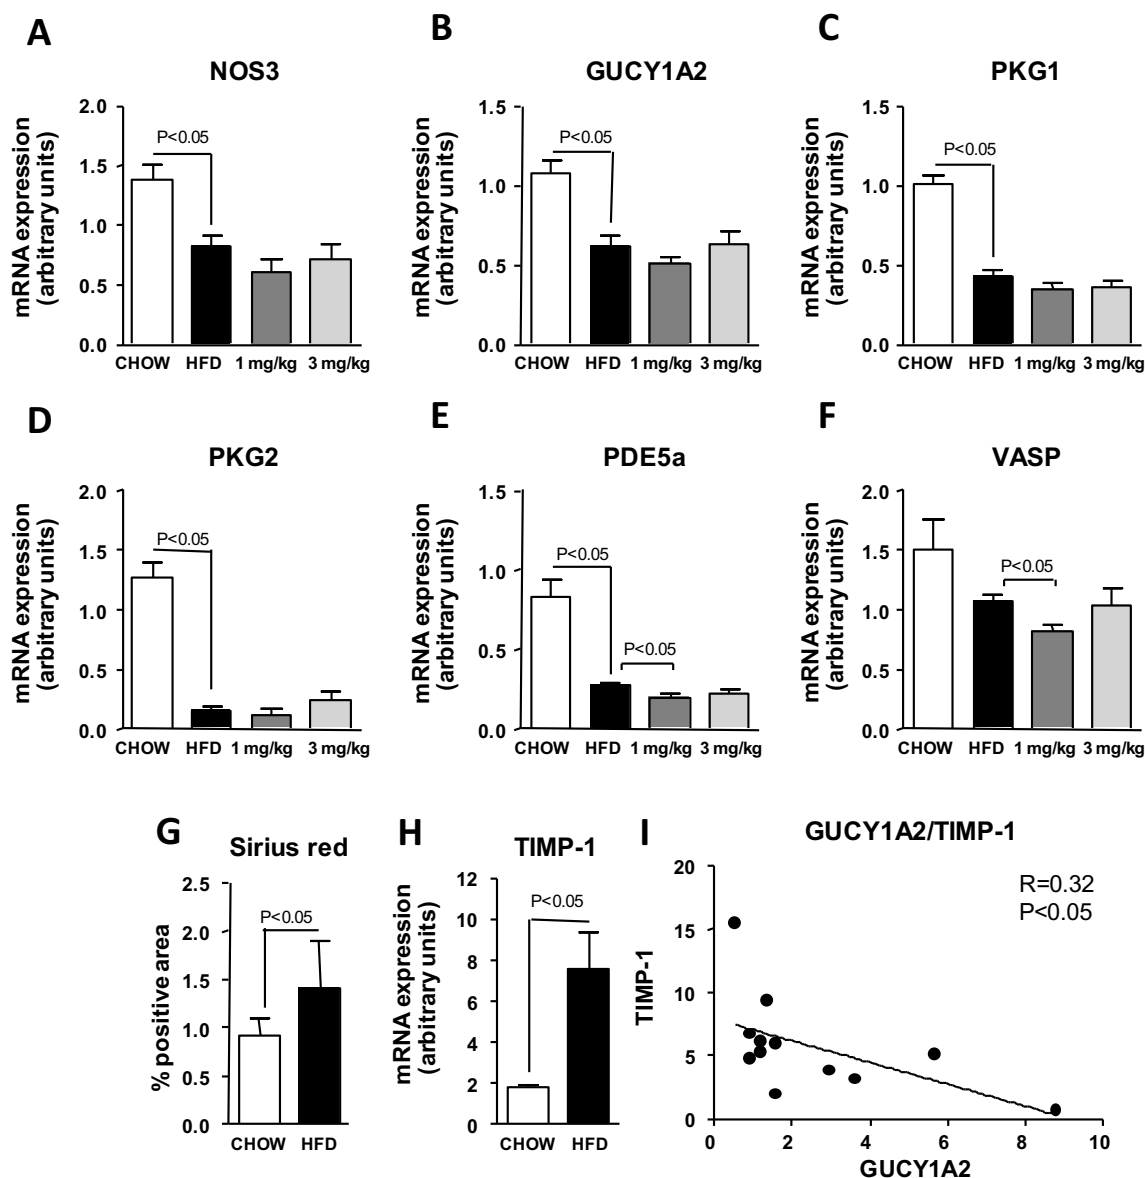

**Supplementary Figure 5. Changes in WAT cGMP pathway and fibrosis in high-fat diet (HFD)-induced obese mice.** WAT mRNA expression for NOS3 (A), GUCY1A2 (B), PKG1 (C), PKG2 (D), PDE5a (E) and VASP (F) in mice receiving either chow diet (n=5), HFD diet (n=10), HFD plus sGC stimulator IW-1973 at 1 mg/kg (n=10) or HFD plus IW-1973 at 3 mg/kg (n=10). (G) Histomorphometric analysis of fibrosis by Sirius red staining. (H) mRNA expression of the fibrosis marker TIMP-1. (I) Correlation between GUCY1A2 and TIMP-1 in human obese WAT. Results are expressed as mean  $\pm$  SEM.

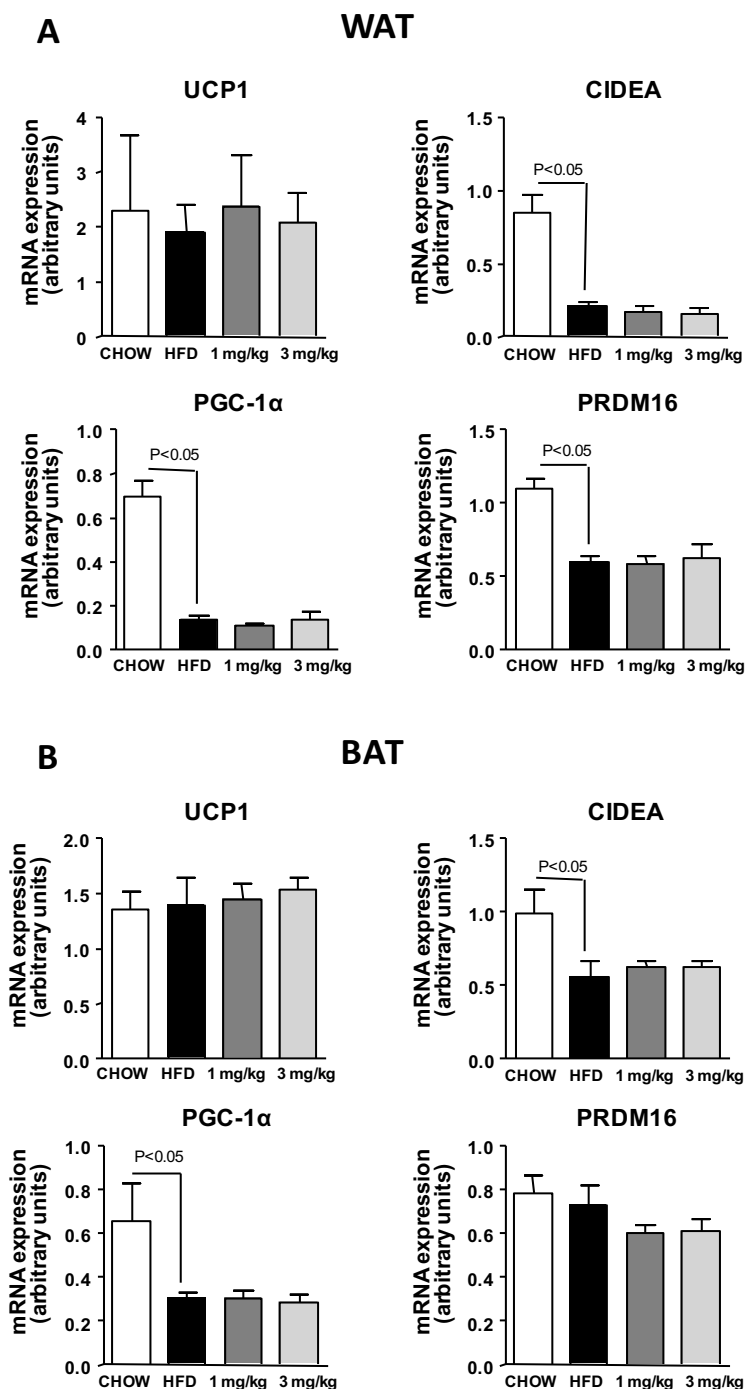

**Supplementary Figure 6. Effects of IW-1973 on adipose tissue thermogenesis.** UCP1, CIDEA, PGC-1 $\alpha$  and PRDM16 mRNA expression in WAT (**A**) and BAT (**B**) in mice receiving either chow diet (n=5), HFD diet (n=10), HFD plus sGC stimulator IW-1973 at 1 mg/kg (n=10) or HFD plus IW-1973 at 3 mg/kg (n=10). Results are expressed as mean  $\pm$  SEM.
